# Supplementary figures and images for: The phosphatidylinositide 3-kinase (PI3K) signaling pathway is a determinant of zileuton response in adults with asthma
Source: PubMed Central journal article supplement — Pharmacogenomics J. 2018 Jan 3;18(5):665–77. doi: 10.1038/s41397-017-0006-0 (PMC6150906; doi:10.1038/s41397-017-0006-0), 2018-01-03

# SUPPLEMENTAL FIGURE 1

A.

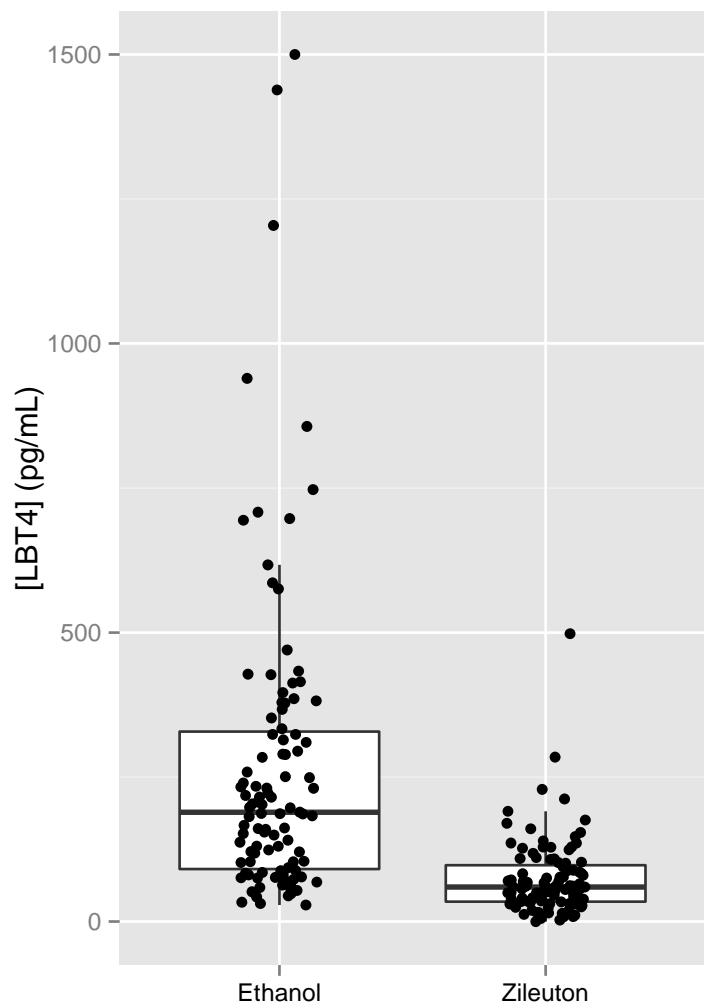

B.

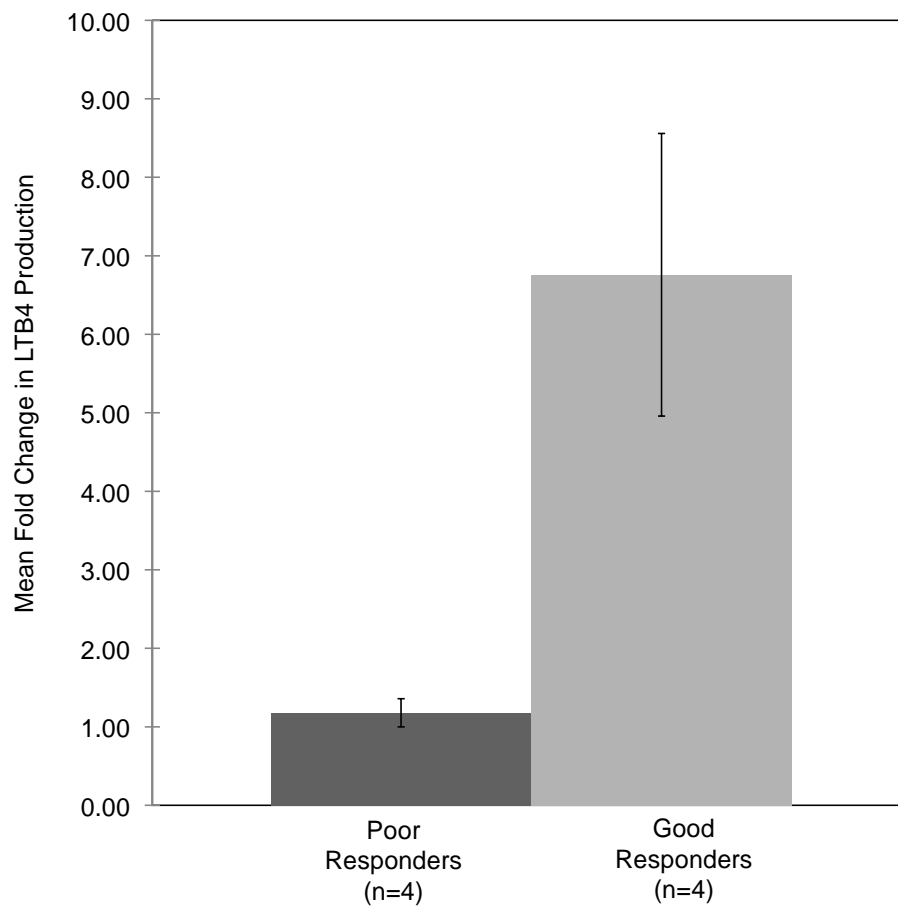

Supplement: 41397_2017_6_MOESM3_ESM.pdf [file 41397_2017_6_MOESM3_ESM.pdf]

SUPPLEMENTAL FIGURE 2

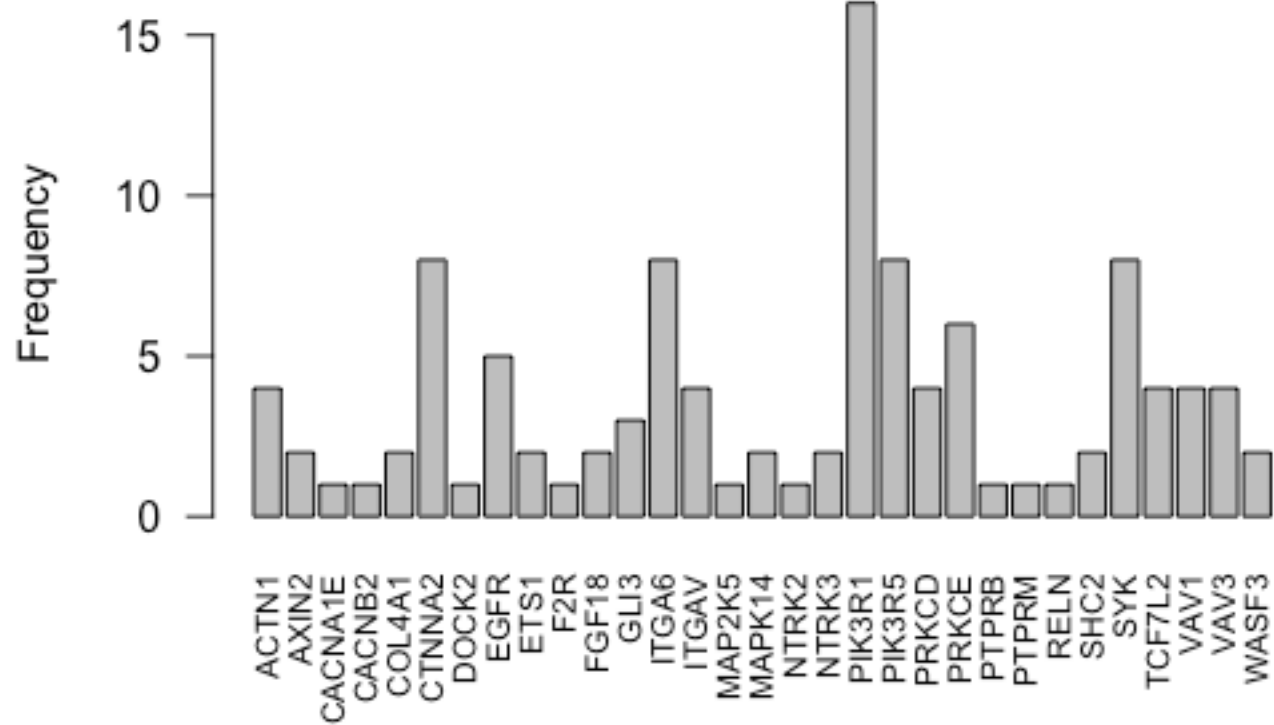

Supplement: 41397_2017_6_MOESM4_ESM.pdf [file 41397_2017_6_MOESM4_ESM.pdf]

SUPPLEMENTAL FIGURE 3

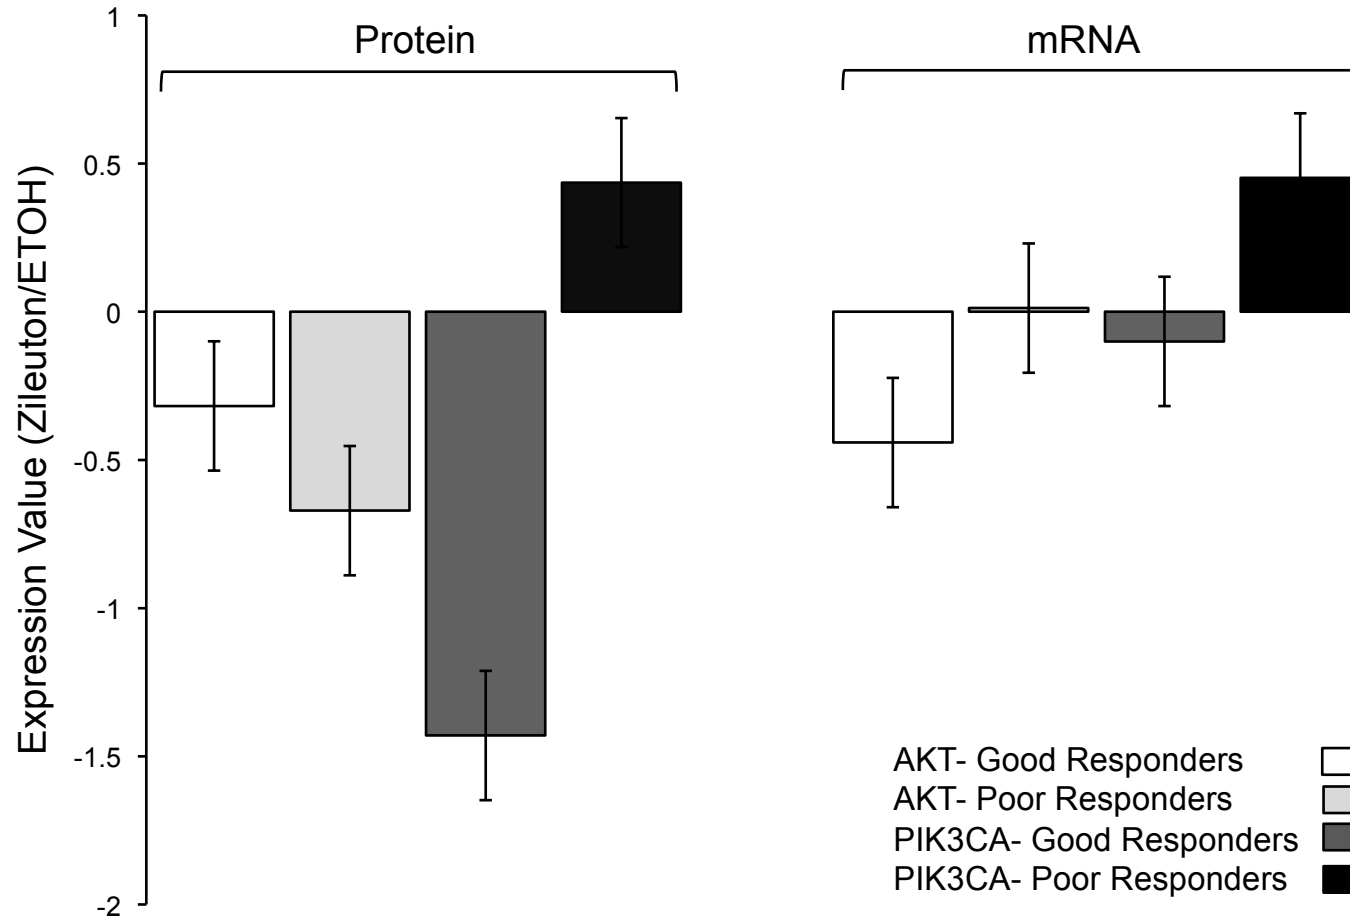

Supplement: 41397_2017_6_MOESM5_ESM.pdf [file 41397_2017_6_MOESM5_ESM.pdf]
